# Supplementary material for: Evidence for Mixed Rationalities in Preference Formation
Source: Hindawi journal article supplement (doi:10.1155/2018/3615476), 2018-01-01
Supplement: f1 [file 3615476.f1.pdf]

# Evidence for mixed rationalities in preference formation

## Supplementary Information: Fitting algorithm

Alexandru-Ionuț Băbeanu and Diego Garlaschelli

*Lorentz Institute for Theoretical Physics, Leiden University, The Netherlands*

(Dated: October 19, 2017)

This document explains the procedure used for simultaneously tuning the  $\alpha$  and  $\beta$  parameters of either of the two stochastic models of culture, such that a match is obtained between the model and the empirical data, in terms of the averages of the AIVD and SIVD observables:

$$\begin{aligned}\langle \text{AIVD}(\alpha, \beta) \rangle &= \text{AIVD}_{\text{emp}}, \\ \langle \text{SIVD}(\alpha, \beta) \rangle &= \text{SIVD}_{\text{emp}},\end{aligned}\tag{1}$$

for a fixed number of prototypes  $k$ , assuming that either of the two equalities above is satisfied when there is an overlap between the uncertainty range associated to the quantity on the left side and that associated to the quantity on the right side.

There are multiple reasons why this problem is challenging:

- an analytical formula for the  $\langle \text{SIVD}(\alpha, \beta) \rangle$  quantity could not be found
- although an analytical formula for the  $\langle \text{AIVD}(\alpha, \beta) \rangle$  quantity was found<sup>1</sup> (see main text), this formula does not allow for inverting the function and for analytically solving the system
- the  $\langle \text{SIVD}(\alpha, \beta) \rangle$ ,  $\text{AIVD}_{\text{emp}}$  and  $\text{SIVD}_{\text{emp}}$  quantities have non-vanishing uncertainty ranges attached to them

Assuming that there exists a unique solution to the above system, a numerical approach for solving it is in order. The method used here relies on a nested, 2-level, adapted bisection method. The first (inner) level of the method takes care of fitting, via bisection, the first quantity for a fixed  $\beta$  – it finds the  $\alpha$  value for which  $\langle \text{AIVD}(\alpha, \beta) \rangle = \text{AIVD}_{\text{emp}}$  is satisfied for a given  $\beta$ . The second (outer) level of the method takes care of fitting, via bisection, the second quantity – it finds the  $\beta$  for which  $\langle \text{SIVD}(\alpha(\beta), \beta) \rangle = \text{SIVD}_{\text{emp}}$  is satisfied, where  $\alpha(\beta)$  is provided by the first level. This choice of assigning the AIVD and SIVD observables and the  $\alpha$  and  $\beta$  parameters to the two levels in this manner is numerically convenient for several reasons. First, the AIVD can be much more easily computed via the analytical formula, such that assigning it to the first level, which is repeated multiple times (once for each value of  $\beta$  that the second level samples) is more effective. Second, the model AIVD

turns out to be relatively insensitive to  $\beta$  for relatively many combinations of values for the  $k$  and  $\alpha$  parameters, such that fitting AIVD in terms of  $\alpha$  within the first level makes more sense.

In addition to adaptations required by the 2-level scheme, other adaptations with respect to the traditional bisection method are needed for allowing it to work with model and empirical uncertainties, as well as to enhance the numerical precision for the  $\langle \text{SIVD}(\alpha, \beta) \rangle$  quantity when needed, to the extent needed. Moreover, in addition to statistical errors originating directly in the empirical uncertainties of the  $\text{AIVD}_{\text{emp}}$  and  $\text{SIVD}_{\text{emp}}$  quantities and in the numerical uncertainty of the model SIVD quantity, the second level of the method is also affected by “systematic errors” on  $\langle \text{SIVD}(\alpha(\beta), \beta) \rangle$ , originating in the fitting procedure at the first level, and indirectly in the empirical uncertainty of  $\text{AIVD}_{\text{emp}}$  – which for all practical purposes can be assumed fixed, thus motivating using the term “systematic” for its propagation to the model SIVD at the second level.

In order to address all these challenges in a self consistent way, the method developed here turns out to be quite sophisticated, which is why it is explained in detail in the following four sections. Specifically, Sec. A focuses on the first fitting level, Sec. B focuses on the second fitting level, Sec. C describes how various sub-problems invoked by the previous two sections are addressed, while Sec. D describes how the tools presented in Sections A, B and C are used for producing some of the results in the main text. The method is potentially of use for addressing other problems that are formally similar to the problem presented here, although certain adaptations might be needed.

Since the method has mostly an algorithmic nature, much of it is explained via pseudocode, such that a few conventions that will be extensively used below and that are not necessarily standard are worth mentioning. First, the “=” symbol is used with double meaning: in a normal statement (such as “ $a = b$ ”) it is to be interpreted as an assignment (of the value of variable  $b$  to variable  $a$ ); in the header of an **if** or **while** statement (such as “**if**  $a = b$ ”) it is to be interpreted as a check (of whether the values of  $a$  and  $b$  are equal). A variable is implicitly declared when it first appears, either on the left side of an assignment or in the header of a function definition (in which case it is also called an argument or function parameter); the scope of the variable is the part of the function below and to the right of the place where it first appears. Functions are distinguished from each other through their names, their numbers of arguments and

---

<sup>1</sup> Which implies that the specific uncertainty range of  $\langle \text{AIVD}(\alpha, \beta) \rangle$  has a null width.

the types of those arguments <sup>2</sup> On the other hand, the arguments of a function are distinguished from each other via their order. Some variables are actually ordered sequences of other variables, which in turn are denoted by  $(x_1, \dots, x_n)$  notation. In the same spirit, an assignments of the type  $X = (x_1, \dots, x_n)$  is referred to as a “variable compression”, while one of the type  $(x_1, \dots, x_n) = X$  is referred to as a “variable decompression”. These allow for keeping the pseudocode compact, while still rigorous. An uncertainty range refers to an interval  $[x - \delta x, x + \delta x]$ , where  $x$  is a mean and  $\delta x$  is an error relying (directly, or indirectly) on a standard mean error calculation, the uncertainty range being formally encoded by the sorted  $(x, \delta x)$  sequence. Note that the square brackets “[.]” are consistently used to denote an interval of real numbers, while the round brackets “(,)” are used to denote an ordered sequence of two or more elements. Finally, it is worth noting that the pseudocode relies heavily on function calls and on recursive definitions, and that there is a certain parallelism between the functions defined in Sec. A and those defined in Sec. B.

### A. First level fitting

This section presents the algorithm part concerned with the first fitting level. The algorithm is split in three main functions: FIT-1, BISECT-1, DISPLACE-1, all of them returning the same type of information. FIT-1 always calls BISECT-1, while the latter may or may not call DISPLACE-1 at any stage, which in turn may or may not call BISECT-1. The pseudocode also invokes two constants, which are assumed to be known a-priori and available for use anywhere in these three functions. The first constant is  $\delta\alpha$ , which controls the desired resolution ( $\delta\alpha$  is essentially a grid-spacing) in the  $\alpha$  parameter, which is here set to the inverse of the number of features:  $\delta\alpha = \frac{1}{F}$  <sup>3</sup>. The second constant is  $\text{AIVD}_{\text{emp}}$ , which stands for the AIVD uncertainty range for the empirical data.

Function FIT-1 acts as an interface for the first-level fitting, which consists of tuning the  $\alpha$  parameter, for given values of  $\beta$  and  $k$ , such that the AIVD quantity matches the empirical value. Here,  $\beta$  is a real number belonging to  $[0, 1]$  while  $k$  is a strictly positive integer number. The method returns the left ( $\alpha_L$ ) and right ( $\alpha_R$ ) margins of the tightest  $\alpha$  interval found, together with the estimated  $\alpha$  match within this interval assuming linearity ( $\alpha_{\text{fit}}$ ) and an associated error ( $\alpha_{\text{err}}$ ). It assumes that the empirical AIVD can actually be uniquely matched by varying  $\alpha$ , for the given values of  $\beta$  and  $k$ . The method essentially carries out some initializations (Lines 2,3), before passing the task to BISECT-1.

---

```

1: function FIT-1( $\beta, k$ )
2:   ( $\alpha_L, \alpha_R$ ) = Init-1( $\delta\alpha$ )
3:    $\text{AIVD}_L = \langle \text{AIVD} \rangle_{\alpha_L, \beta}^k$ ;  $\text{AIVD}_R = \langle \text{AIVD} \rangle_{\alpha_R, \beta}^k$ 
4:   return BISECT-1( $\alpha_L, \alpha_R, \text{AIVD}_L, \text{AIVD}_R, \beta, k$ )
5: end function

```

▷ initializing the  $\alpha$ -interval  
 ▷ analytic calculations (see main text)

Function BISECT-1 is mostly a typical, recursive implementation of the bisection method. This sequentially narrows down the  $[\alpha_L, \alpha_R]$  interval, such that at each stage the empirical AIVD is contained, namely that  $\min(\text{AIVD}_L, \text{AIVD}_R) < \text{AIVD}_{\text{emp}} < \max(\text{AIVD}_L, \text{AIVD}_R)$  is satisfied, where the  $\text{AIVD}_L, \text{AIVD}_R$  values correspond to the left and right margins of the  $\alpha$  interval. Here,  $\alpha_L, \alpha_R, \text{AIVD}_L, \text{AIVD}_R$  are real numbers belonging to  $[0, 1]$  while  $\beta$  and  $k$  are of the same type as in FIT-1. It returns the same type of information as FIT-1. The method converges, the fitting being considered complete, when the interval has reached the  $\delta\alpha$  resolution limit, in which case estimations for an

“ideal”  $\alpha$  inside this interval  $\alpha_{\text{fit}}$  and its error  $\alpha_{\text{err}}$  are made and returned together with the boundaries of the interval (lines 3-6). Moreover, the method may also call DISPLACE-1 in case the  $\text{AIVD}_M$  value corresponding to the computed midpoint  $\alpha_M$  happens to fall within the  $\text{AIVD}_{\text{emp}}$  uncertainty range (lines 8-10) – this is needed in order to keep the output format consistent and the final  $\alpha$  interval relatively narrow. Otherwise, the method decides to zoom in (by calling itself) on either the left or right halves of the interval, depending on the position of  $\text{AIVD}_{\text{emp}}$  with respect to  $\text{AIVD}_L, \text{AIVD}_M$  and  $\text{AIVD}_R$  (lines 11-16).

---

<sup>2</sup> Sometimes this can be confusing, since the types of the arguments are only mentioned in the text before the definition of the function. In these cases however, the reader is guided by the names of the arguments, which in the function definition are

kept as close as possible to those in the function call(s).

<sup>3</sup> There is no clear lower bound on  $\delta\alpha$ , regardless of which stochastic model is used, but  $\frac{1}{F}$  is a lower bound on  $\delta\beta$  when PG is used, so for simplicity the choice  $\delta\alpha = \delta\beta = \frac{1}{F}$  is made.

```

1: function BISECT-1( $\alpha_L, \alpha_R, \text{AIVD}_L, \text{AIVD}_R, \beta, k$ )
2:    $\alpha_M = \text{MIDDLE}(\alpha_L, \alpha_R, \delta\alpha)$  ▷ computing midpoint on the  $\alpha$  grid
3:   if  $\neg \text{DISTINCT}(\alpha_M, \alpha_L, \alpha_R)$  then
4:      $(\alpha_{\text{fit}}, \alpha_{\text{err}}) = \text{INTERNFITLIN-1}(\alpha_L, \alpha_R, \text{AIVD}_L, \text{AIVD}_R, \text{AIVD}_{\text{emp}})$ 
5:     return  $(\alpha_L, \alpha_R, \alpha_{\text{fit}}, \alpha_{\text{err}})$  ▷ fitting complete
6:   end if
7:    $\text{AIVD}_M = \langle \text{AIVD} \rangle_{\alpha_M, \beta}^k$  ▷ analytic calculations (see main text)
8:   if  $\text{MATCH-1}(\text{AIVD}_M, \text{AIVD}_{\text{emp}})$  then
9:     return  $\text{DISPLACE-1}(\alpha_L, \alpha_R, \alpha_M, \text{AIVD}_L, \text{AIVD}_R, \beta, k)$ 
10:  end if
11:  if  $\text{ORD-1}(\text{AIVD}_L, \text{AIVD}_R) = \text{ORD-1}(\text{AIVD}_M, \text{AIVD}_{\text{emp}})$  then
12:     $\alpha_L = \alpha_M; \text{AIVD}_L = \text{AIVD}_M$  ▷ selecting right interval
13:  else
14:     $\alpha_R = \alpha_M; \text{AIVD}_R = \text{AIVD}_M$  ▷ selecting left interval
15:  end if
16:  return  $\text{BISECT-1}(\alpha_L, \alpha_R, \text{AIVD}_L, \text{AIVD}_R, \beta, k)$  ▷ zooming in on selected interval
17: end function

```

Function DISPLACE-1 attempts to displace the midpoint  $\alpha_M$  previously calculated at some stage in BISECT-1, in a way that its associated AIVD would fall outside the empirical uncertainty range. This function has all the arguments of BISECT-1 and  $\alpha_M$  as an additional one, which is a real number belonging to  $[0, 1]$ . It returns the same type of information as FIT-1. The method first computes a “secondary” midpoint  $\alpha'_M$  to the left of  $\alpha_M$  and its corresponding  $\text{AIVD}'_M$  value. If the reso-

lution limit  $\delta\alpha$  is not reached and  $\text{AIVD}'_M$  falls outside the  $\text{AIVD}_{\text{emp}}$  range, BISECT-1 is applied further to the  $[\alpha'_M, \alpha_R]$  interval (lines 2-11). Otherwise, the analogous procedure is applied on the right side (12-21). If the procedure fails to provide a convenient, secondary midpoint on either side, the fitting is considered complete with the current  $[\alpha_L, \alpha_R]$  interval and the  $\alpha_{\text{fit}}, \alpha_{\text{err}}$  estimates made like in BISECT-1 (lines 22-23).

```

1: function DISPLACE-1( $\alpha_L, \alpha_R, \alpha_M, \text{AIVD}_L, \text{AIVD}_R, \beta, k$ )
2:    $\alpha'_M = \text{MIDDLE}(\alpha_L, \alpha_M, \delta\alpha)$  ▷ trying displacement to the left on the  $\alpha$  grid
3:   if  $\text{DISTINCT}(\alpha'_M, \alpha_L, \alpha_M)$  then
4:      $\text{AIVD}'_M = \langle \text{AIVD} \rangle_{\alpha'_M, \beta}^k$  ▷ analytic calculations (see main text)
5:     if  $\neg \text{MATCH-1}(\text{AIVD}'_M, \text{AIVD}_{\text{emp}})$  then
6:       if  $\text{ORD-1}(\text{AIVD}_L, \text{AIVD}_R) = \text{ORD-1}(\text{AIVD}'_M, \text{AIVD}_{\text{emp}})$  then
7:          $\alpha_L = \alpha'_M; \text{AIVD}_L = \text{AIVD}'_M$ 
8:         return  $\text{BISECT-1}(\alpha_L, \alpha_R, \text{AIVD}_L, \text{AIVD}_R, \beta, k)$  ▷ zooming in on corrected interval
9:       end if
10:     end if
11:   end if
12:    $\alpha'_M = \text{MIDDLE}(\alpha_M, \alpha_R, \delta\alpha)$  ▷ trying displacement to the right on the  $\alpha$  grid
13:   if  $\text{DISTINCT}(\alpha'_M, \alpha_M, \alpha_R)$  then
14:      $\text{AIVD}'_M = \langle \text{AIVD} \rangle_{\alpha'_M, \beta}^k$  ▷ analytic calculations (see main text)
15:     if  $\neg \text{MATCH-1}(\text{AIVD}'_M, \text{AIVD}_{\text{emp}})$  then
16:       if  $\text{ORD-1}(\text{AIVD}_L, \text{AIVD}_R) \neq \text{ORD-1}(\text{AIVD}'_M, \text{AIVD}_{\text{emp}})$  then
17:          $\alpha_R = \alpha'_M; \text{AIVD}_R = \text{AIVD}'_M$ 
18:         return  $\text{BISECT-1}(\alpha_L, \alpha_R, \text{AIVD}_L, \text{AIVD}_R, \beta, k)$  ▷ zooming in on corrected interval
19:       end if
20:     end if
21:   end if
22:    $(\alpha_{\text{fit}}, \alpha_{\text{err}}) = \text{INTERNFITLIN-1}(\alpha_L, \alpha_R, \text{AIVD}_L, \text{AIVD}_R, \text{AIVD}_{\text{emp}})$ 
23:   return  $(\alpha_L, \alpha_R, \alpha_{\text{fit}}, \alpha_{\text{err}})$  ▷ fitting complete
24: end function

```

## B. Second level fitting

This section presents the algorithm part concerned with the second fitting level. Each of the three functions

of the first fitting level (Sec. A) has a correspondent here:

FIT-2, BISECT-2, DISPLACE-2, all of them returning the same type of information<sup>4</sup>, each of them having a similar, structure, purpose and role to the correspondent within the first fitting level. Additionally, this section presents the pseudocode for a fourth function, NUMSIVD, which carries out the numerical SIVD calculations. In addition to the two constants introduced at the first level, the second level pseudocode invokes two other constants, which are also assumed to be known a-priori and available for use anywhere in these four functions. First,  $\delta\beta$  is the desired resolution in the  $\beta$  parameter, which is here set to the inverse of the number of features:  $\delta\beta = \frac{1}{F}$ . Second,  $\text{SIVD}_{\text{emp}}$  is the SIVD uncertainty range for the empirical data.

In relation to the first three functions, the descriptions below attempt to mostly emphasize the elements that come in addition with respect to their first-level correspondents. Some of these elements have a repetitive nature and are worth explaining before moving to the specific description of each function. First, the (generic)  $\bar{\beta}_X$  notation (where “X” can stand for “L”, “R” or “M”) denotes the (generic) “composite fitting information”  $\bar{\beta}_X = (\beta, \alpha_L, \alpha_R, \alpha_{\text{fit}}, \alpha_{\text{err}})_X$ , which is a 5-tuple consisting of a  $\beta$  value together with the associated four values returned by a (generic) call  $\text{FIT-1}(\beta, k)$  for that specific  $\beta$  and some arbitrary  $k$ . Second, whenever an “SIVD<sub>X</sub>” variable appears in the first three functions (where “X” is again a generic label), except for  $\text{SIVD}_{\text{emp}}$ , it actually denotes the (generic) “composite SIVD information”  $\text{SIVD}_X = ((\text{SIVD}_L^{\text{fit}}, \text{SIVD}_L^{\text{err}}), (\text{SIVD}_R^{\text{fit}}, \text{SIVD}_R^{\text{err}}))_X$ , which is a pair of pairs of real numbers, each inner pair corresponding to a model SIVD uncertainty range associated to one margin of an  $\alpha$  interval returned by a call to FIT-1, while both inner pairs have the same  $\beta$ . This schematically reads:

$$\begin{aligned} (\beta, \alpha_L) &\rightarrow (\text{SIVD}_L^{\text{fit}}, \text{SIVD}_L^{\text{err}}), \\ (\beta, \alpha_R) &\rightarrow (\text{SIVD}_R^{\text{fit}}, \text{SIVD}_R^{\text{err}}), \end{aligned}$$

Third, any (generic) call  $\text{NUMSIVD}(\bar{\beta}, k)$  is necessarily preceded by an associated (generic) call  $\text{FIT-1}(\beta, k)$  and by an associated (generic) variable compression  $\bar{\beta} = (\beta, \alpha_L, \alpha_R, \alpha_{\text{fit}}, \alpha_{\text{err}})$ , the last two being needed for producing the composite fitting information  $\bar{\beta}$ . Fourth, whenever a piece of composite SIVD information appears in a call to ORD-2 or MATCH-2, it is accompanied by an associated piece of composite fitting information, which allows for the mean, statistical error and systematic error of in the model SIVD to be all reconstructed within, for a given combination of  $\beta$  and  $k$ .

Function FIT-2 acts as an interface for the second-level fitting, which consists of tuning the  $\beta$  parameter, for a given value of  $k$ , such that the SIVD quantity matches the empirical value, relying on an underlying tuning of the  $\alpha$  parameter in terms of the AIVD quantity (using FIT-1). Here,  $k$  is a strictly positive, integer number. The method returns the composite fitting information associated to the left ( $\bar{\beta}_L$ ) and right ( $\bar{\beta}_R$ ) margins of the tightest  $\beta$  interval found, together with the estimated  $\beta$  match within this interval ( $\beta_{\text{fit}}$ ) and its associated error ( $\beta_{\text{err}}$ ). It assumes that the empirical SIVD can actually be uniquely matched by varying  $\beta$  and  $\alpha$ , for the given value of  $k$ . After checking that there exists a meaningful  $[\beta_L, \beta_R]$  interval for which the first-level fitting is possible (lines 2,3), the method conducts the numeric SIVD calculations on both sides of the interval (line 6), preceded, on each side, by the first level fitting and the decompression (lines 4,5, as explained above), in order to finally pass the task to BISECT-2.

---

```

1: function FIT-2( $k$ )
2:    $(\beta_L, \beta_R) = \text{Init-2}(\delta\beta, k, \text{AIVD}_{\text{emp}})$  ▷ initializing the  $\beta$ -interval
3:   if  $\beta_L < \beta_R$  then
4:      $(\alpha_L^L, \alpha_L^R, \alpha_L^{\text{fit}}, \alpha_L^{\text{err}}) = \text{FIT-1}(\beta_L, k); (\alpha_R^L, \alpha_R^R, \alpha_R^{\text{fit}}, \alpha_R^{\text{err}}) = \text{FIT-1}(\beta_R, k)$ 
5:      $\bar{\beta}_L = (\beta_L, \alpha_L^L, \alpha_L^R, \alpha_L^{\text{fit}}, \alpha_L^{\text{err}}); \bar{\beta}_R = (\beta_R, \alpha_R^L, \alpha_R^R, \alpha_R^{\text{fit}}, \alpha_R^{\text{err}})$ 
6:      $\text{SIVD}_L = \text{NUMSIVD}(\bar{\beta}_L, k); \text{SIVD}_R = \text{NUMSIVD}(\bar{\beta}_R, k)$  ▷ numeric calculations
7:     return BISECT-2( $\bar{\beta}_L, \bar{\beta}_R, \text{SIVD}_L, \text{SIVD}_R, k$ )
8:   end if
9:   return FittingImpossibleError
10: end function

```

---

<sup>4</sup> The type of information returned by the three functions at a second-level fitting is different than that of the three functions at the first-level fitting, and actually more complex.

Function BISECT-2 is another recursive implementation of the bisection method, which sequentially narrows down the  $[\beta_L, \beta_R]$  interval, such that at each stage the empirical SIVD is contained. Here,  $\bar{\beta}_L, \bar{\beta}_R$  are 5-tuples of

real numbers encoding the left and right pieces of composite fitting information,  $\text{SIVD}_L, \text{SIVD}_R$  are the pairs of pairs of real numbers encoding the left- $\beta$  and right- $\beta$  pieces of composite SIVD information, while  $k$  is of the same type as in FIT-2. It returns the same type of information as FIT-2. Like BISECT-1, the function consists of a part concerned with convergence (lines 4-7), a part con-

cerned with the jump to DISPLACE-2 (lines 11-13) and a part concerned with choosing between the left and right  $\beta$  subintervals and with zooming in on the chosen one (lines 14-19). Note the additional statements concerned with decompressing the composite fitting information (line 2) and with preparing the numeric SIVD calculations at the midpoint (lines 8-9).

---

```

1: function BISECT-2( $\bar{\beta}_L, \bar{\beta}_R, \text{SIVD}_L, \text{SIVD}_R, k$ )
2:   ( $\beta_L, \alpha_L^L, \alpha_L^R, \alpha_L^{\text{fit}}, \alpha_L^{\text{err}}$ ) =  $\bar{\beta}_L$ ; ( $\beta_R, \alpha_R^L, \alpha_R^R, \alpha_R^{\text{fit}}, \alpha_R^{\text{err}}$ ) =  $\bar{\beta}_R$ 
3:    $\beta_M = \text{MIDDLE}(\beta_L, \beta_R, \delta\beta)$ 
4:   if  $\neg \text{DISTINCT}(\beta_M, \beta_L, \beta_R)$  then
5:     ( $\beta_{\text{fit}}, \beta_{\text{err}}$ ) =  $\text{INTERNFITLIN-2}(\bar{\beta}_L, \bar{\beta}_R, \text{SIVD}_L, \text{SIVD}_R, \text{SIVD}_{\text{emp}})$ 
6:     return ( $\bar{\beta}_L, \bar{\beta}_R, \beta_{\text{fit}}, \beta_{\text{err}}$ )
7:   end if
8:   ( $\alpha_M^L, \alpha_M^R, \alpha_M^{\text{fit}}, \alpha_M^{\text{err}}$ ) =  $\text{FIT-1}(\beta_M, k)$ 
9:    $\beta_M = (\beta_M, \alpha_M^L, \alpha_M^R, \alpha_M^{\text{fit}}, \alpha_M^{\text{err}})$ 
10:   $\text{SIVD}_M = \text{NUMSIVD}(\beta_M, k)$  ▷ numeric calculations
11:  if  $\text{MATCH-2}(\bar{\beta}_M, \text{SIVD}_M, \text{SIVD}_{\text{emp}})$  then
12:    return  $\text{DISPLACE-2}(\bar{\beta}_L, \bar{\beta}_R, \bar{\beta}_M, \text{SIVD}_L, \text{SIVD}_R, k)$ 
13:  end if
14:  if  $\text{ORD-2}(\bar{\beta}_L, \bar{\beta}_R, \text{SIVD}_L, \text{SIVD}_R) = \text{ORD-2}(\bar{\beta}_M, \text{SIVD}_M, \text{SIVD}_{\text{emp}})$  then
15:     $\bar{\beta}_L = \bar{\beta}_M$ ;  $\text{SIVD}_L = \text{SIVD}_M$  ▷ selecting right interval
16:  else
17:     $\bar{\beta}_R = \bar{\beta}_M$ ;  $\text{SIVD}_R = \text{SIVD}_M$  ▷ selecting left interval
18:  end if
19:  return  $\text{BISECT-2}(\bar{\beta}_L, \bar{\beta}_R, \text{SIVD}_L, \text{SIVD}_R, k)$  ▷ zooming in on selected interval
20: end function

```

---

Function DISPLACE-2 attempts to displace the midpoint  $\beta_M$  previously calculated at some stage in BISECT-2, in a way that its associated SIVD uncertainty range does not overlap with the empirical one. This function has all the arguments of BISECT-1 and  $\bar{\beta}_M$  as an additional one, which is a 5-tuple of real numbers encoding the midpoint composite fitting information. It returns the same type of information as FIT-2. Like DISPLACE-1,

the function consists of a part that attempts a displacement to the left (lines 3-14), one that attempts a displacement to the right (lines 15-26) and one that takes care of the convergence (lines 27-28). Note the additional statements concerned with decompressing the composite fitting information (line 2) and with preparing the numeric SIVD calculations for the left/right secondary midpoint (lines 5-6/17-18).

---

```

1: function DISPLACE-2( $\bar{\beta}_L, \bar{\beta}_R, \bar{\beta}_M, \text{SIVD}_L, \text{SIVD}_R, k$ )
2:   ( $\beta_L, \alpha_L^L, \alpha_L^R, \alpha_L^{\text{fit}}, \alpha_L^{\text{err}}$ ) =  $\bar{\beta}_L$ ; ( $\beta_R, \alpha_R^L, \alpha_R^R, \alpha_R^{\text{fit}}, \alpha_R^{\text{err}}$ ) =  $\bar{\beta}_R$ ; ( $\beta_M, \alpha_M^L, \alpha_M^R, \alpha_M^{\text{fit}}, \alpha_M^{\text{err}}$ ) =  $\bar{\beta}_M$ 
3:    $\beta'_M = \text{MIDDLE}(\beta_L, \beta_M, \delta\beta)$  ▷ trying displacement to the left
4:   if  $\text{DISTINCT}(\beta'_M, \beta_L, \beta_M)$  then
5:     ( $\alpha_M'^L, \alpha_M'^R, \alpha_M'^{\text{fit}}, \alpha_M'^{\text{err}}$ ) =  $\text{FIT-1}(\beta'_M, k)$ 
6:      $\beta'_M = (\beta'_M, \alpha_M'^L, \alpha_M'^R, \alpha_M'^{\text{fit}}, \alpha_M'^{\text{err}})$ 
7:      $\text{SIVD}'_M = \text{NUMSIVD}(\beta'_M, k)$  ▷ numeric calculations
8:     if  $\neg \text{MATCH-2}(\bar{\beta}'_M, \text{SIVD}'_M, \text{SIVD}_{\text{emp}})$  then
9:       if  $\text{ORD-2}(\bar{\beta}_L, \bar{\beta}_R, \text{SIVD}_L, \text{SIVD}_R) = \text{ORD-2}(\bar{\beta}'_M, \text{SIVD}'_M, \text{SIVD}_{\text{emp}})$  then
10:         $\bar{\beta}_L = \bar{\beta}'_M$ ;  $\text{SIVD}_L = \text{SIVD}'_M$ 
11:        return  $\text{BISECT-2}(\bar{\beta}_L, \bar{\beta}_R, \text{SIVD}_L, \text{SIVD}_R, k)$  ▷ zooming in on corrected interval
12:      end if
13:    end if
14:  end if
15:   $\beta'_M = \text{MIDDLE}(\beta_M, \beta_R, \delta\beta)$  ▷ trying displacement to the right
16:  if  $\text{DISTINCT}(\beta'_M, \beta_M, \beta_R)$  then

```

---

```

17:  ( $\dot{\alpha}_M^L, \dot{\alpha}_M^R, \dot{\alpha}_M^{\text{fit}}, \dot{\alpha}_M^{\text{err}}$ ) = FIT-1( $\beta'_M, k$ )
18:   $\beta'_M = (\beta'_M, \dot{\alpha}_M^L, \dot{\alpha}_M^R, \dot{\alpha}_M^{\text{fit}}, \dot{\alpha}_M^{\text{err}})$ 
19:   $\text{SIVD}'_M = \text{NUMSIVD}(\beta'_M, k)$  ▷ numeric calculations
20:  if  $\neg \text{MATCH-2}(\bar{\beta}'_M, \text{SIVD}'_M, \text{SIVD}_{\text{emp}})$  then
21:    if  $\text{ORD-2}(\beta_L, \beta_R, \text{SIVD}_L, \text{SIVD}_R) \neq \text{ORD-2}(\bar{\beta}'_M, \text{SIVD}'_M, \text{SIVD}_{\text{emp}})$  then
22:       $\bar{\beta}_R = \bar{\beta}'_M$ ;  $\text{SIVD}_R = \text{SIVD}'_M$ 
23:      return  $\text{BISECT-2}(\beta_L, \bar{\beta}_R, \text{SIVD}_L, \text{SIVD}_R, k)$  ▷ zooming in on corrected interval
24:    end if
25:  end if
26: end if
27:  ( $\beta_{\text{fit}}, \beta_{\text{err}}$ ) =  $\text{INTERNFITLIN-2}(\bar{\beta}_L, \bar{\beta}_R, \text{SIVD}_L, \text{SIVD}_R, \text{SIVD}_{\text{emp}})$ 
28:  return ( $\beta_L, \bar{\beta}_R, \beta_{\text{fit}}, \beta_{\text{err}}$ )
29: end function

```

Function NUMSIVD numerically generates a piece of composite SIVD information with a precision that is as high as possible. Here,  $\bar{\beta}$  is a 5-tuple of real numbers encoding a composite fitting information, while  $k$  is a positive integer number. One sequence of SIVD values is numerically generated (lines 4 and 11) for each of the two margins of the  $\alpha$  interval (contained in  $\bar{\beta}$ ), for the given  $\beta$  (also contained in  $\bar{\beta}$ ) and the given  $k$ . An uncertainty range is obtained from each of the two sequences (lines 5 and 13). These two uncertainty ranges are used together with the information in  $\bar{\beta}$  to produce estimates for an average, a statistical error and a systematic error that are  $\bar{\beta}$ -specific rather than  $(\alpha, \beta)$ -specific (lines 6, 7 and 14, 15). The number of SIVD values in the two se-

quences is increased and the calculations are repeated as long as the condition in line 9 remains true, namely as long as: the statistical error is higher than the systematic error, the desired separation between the model and empirical (statistical) uncertainty ranges is not reached and the maximal SIVD sequence length is not reached. The desired separation and the SIVD sequence length are controlled via variables  $s$  and  $n$ , initialized in line 2 – the initial values of these variables, as well as the upper bound on the latter are hard-coded, as visible in the pseudocode, and have been decided after some experimentation with NUMSIVD, but they are not essential for the actual outcome. Also note the decompression of the composite fitting information (line 3) and the decompression of SIVD uncertainty ranges (lines 8 and 16).

```

1: function NUMSIVD( $\bar{\beta}, k$ )
2:    $n = 20$ ;  $s = 5$  ▷ initial number of realizations and desired separation
3:   ( $\beta, \alpha_L, \alpha_R, \alpha_{\text{fit}}, \alpha_{\text{err}}$ ) =  $\bar{\beta}$ 
4:    $\text{SIVD}_L^{\text{seq}} = \text{GENSEQSIVD}(\alpha_L, \beta, k, n)$ ;  $\text{SIVD}_R^{\text{seq}} = \text{GENSEQSIVD}(\alpha_R, \beta, k, n)$ 
5:    $\text{SIVD}_L = \text{COMPAVGERR}(\text{SIVD}_L^{\text{seq}})$ ;  $\text{SIVD}_R = \text{COMPAVGERR}(\text{SIVD}_R^{\text{seq}})$ 
6:    $\text{SIVD} = \text{INTERPOL}(\alpha_L, \alpha_R, \alpha_{\text{fit}}, \text{SIVD}_L, \text{SIVD}_R)$ 
7:    $\text{SIVD}_{\text{sys}} = \text{COMPSYSTERR}(\alpha_L, \alpha_R, \alpha_{\text{err}}, \text{SIVD}_L, \text{SIVD}_R)$ 
8:   ( $\text{SIVD}_{\text{avg}}, \text{SIVD}_{\text{stat}}$ ) =  $\text{SIVD}$ ; ( $\text{SIVD}_{\text{emp}}^{\text{avg}}, \text{SIVD}_{\text{emp}}^{\text{stat}}$ ) =  $\text{SIVD}_{\text{emp}}$ 
9:   while  $\text{SIVD}_{\text{stat}} > \text{SIVD}_{\text{sys}} \wedge (\text{SIVD}_{\text{stat}} + \text{SIVD}_{\text{emp}}^{\text{stat}} > |\text{SIVD}_{\text{emp}}^{\text{avg}} - \text{SIVD}_{\text{avg}}|/s) \wedge n < 350$  do
10:      $n = 2 \cdot n$ 
11:      $\text{SIVD}_L^{\text{tmpSeq}} = \text{GENSEQSIVD}(\alpha_L, \beta, k, n)$ ;  $\text{SIVD}_R^{\text{tmpSeq}} = \text{GENSEQSIVD}(\alpha_R, \beta, k, n)$ 
12:      $\text{SIVD}_L^{\text{seq}} = \text{MERGE}(\text{SIVD}_L^{\text{seq}}, \text{SIVD}_L^{\text{tmpSeq}})$ ;  $\text{SIVD}_R^{\text{seq}} = \text{MERGE}(\text{SIVD}_R^{\text{seq}}, \text{SIVD}_R^{\text{tmpSeq}})$ 
13:      $\text{SIVD}_L = \text{COMPAVGERR}(\text{SIVD}_L^{\text{seq}})$ ;  $\text{SIVD}_R = \text{COMPAVGERR}(\text{SIVD}_R^{\text{seq}})$ 
14:      $\text{SIVD} = \text{INTERPOL}(\alpha_L, \alpha_R, \alpha_{\text{fit}}, \text{SIVD}_L, \text{SIVD}_R)$ 
15:      $\text{SIVD}_{\text{sys}} = \text{COMPSYSTERR}(\alpha_L, \alpha_R, \alpha_{\text{err}}, \text{SIVD}_L, \text{SIVD}_R)$ 
16:     ( $\text{SIVD}_{\text{avg}}, \text{SIVD}_{\text{stat}}$ ) =  $\text{SIVD}$ 
17:   end while
18:   return ( $\text{SIVD}_L, \text{SIVD}_R$ )
19: end function

```

### C. Used functions

This section describes functions that are used by the pseudocode in sections A or B but are not described

there. The following is a list of functions for which the pseudocode is also provided, following each text description.

Function INTERFITLIN-1 fine-tunes the  $\alpha$  parameter

such that  $\text{AIVD}_{\text{emp}}$  is matched, relying on a linear approximation of the model AIVD as a function of  $\alpha$  within the  $(\alpha_L, \alpha_R)$  interval, using the boundary values  $\text{AIVD}_L$  and  $\text{AIVD}_R$ . Its arguments are of the same type as those of `INTERFITLIN` (described below), except that  $\text{AIVD}_L$

and  $\text{AIVD}_R$  are real numbers rather than uncertainty ranges. The output structure is entirely the same as that of `INTERFITLIN`. It is essentially a first-level fitting interface for `INTERFITLIN`, which is called after specifying that the errors associated to  $\text{AIVD}_L$  and  $\text{AIVD}_R$  are zero.

---

```

1: function INTERFITLIN-1( $\alpha_L, \alpha_R, \text{AIVD}_L, \text{AIVD}_R, \text{AIVD}_{\text{emp}}$ )
2:    $\text{AIVD}'_L = (\text{AIVD}_L, 0)$ ;  $\text{AIVD}'_R = (\text{AIVD}_R, 0)$ 
3:   return INTERFITLIN( $\alpha_L, \alpha_R, \text{AIVD}'_L, \text{AIVD}'_R, \text{AIVD}_{\text{emp}}$ )
4: end function

```

---

Function `INTERFITLIN-2` fine-tunes the  $\beta$  parameter such that  $\text{SIVD}_{\text{emp}}$  is matched, relying on a linear approximation of the model SIVD as a function of  $\beta$  within the  $[\beta_L, \beta_R]$  interval, using the boundary information stored in  $\text{SIVD}_L$  and  $\text{SIVD}_R$ . Its arguments are of the same type as those of `INTERFITLIN` (described below), except that  $\bar{\beta}_L$  and  $\bar{\beta}_R$  are 5-tuples or real numbers rather than real numbers and  $\text{SIVD}_L$  and  $\text{SIVD}_R$  are pieces composite SIVD information rather than uncertainty ranges. The output structure is entirely the same

as that of `INTERFITLIN`. It is essentially a second-level fitting interface for `INTERFITLIN`, which is called after carrying out the following two operations: computing the mean, statistical error and systematic error on each of the two margins of the  $\beta$  interval, using the right combination of composite fitting information and composite SIVD information (lines 2,3); compressing information into an SIVD uncertainty range for each of the two margins, after choosing the highest among the two errors for each margin.

---

```

1: function INTERFITLIN-2( $\bar{\beta}_L, \bar{\beta}_R, \text{SIVD}_L, \text{SIVD}_R, \text{SIVD}_{\text{emp}}$ )
2:    $(\text{SIVD}^{\text{avg}}_L, \text{SIVD}^{\text{stat}}_L, \text{SIVD}^{\text{syst}}_L) = \text{MEANSTATSYST}(\bar{\beta}_L, \text{SIVD}_L)$ 
3:    $(\text{SIVD}^{\text{avg}}_R, \text{SIVD}^{\text{stat}}_R, \text{SIVD}^{\text{syst}}_R) = \text{MEANSTATSYST}(\bar{\beta}_R, \text{SIVD}_R)$ 
4:    $\text{SIVD}'_L = (\text{SIVD}^{\text{avg}}_L, \text{MAX}(\text{SIVD}^{\text{stat}}_L, \text{SIVD}^{\text{syst}}_L))$ 
5:    $\text{SIVD}'_R = (\text{SIVD}^{\text{avg}}_R, \text{MAX}(\text{SIVD}^{\text{stat}}_R, \text{SIVD}^{\text{syst}}_R))$ 
6:   return INTERFITLIN( $\beta_L, \beta_R, \text{SIVD}'_L, \text{SIVD}'_R, \text{SIVD}_{\text{emp}}$ )
7: end function

```

---

Function `MATCH-1` checks whether AIVD (real value) falls within the uncertainty range specified by  $\text{AIVD}_{\text{emp}}$ .

It acts as an interface for `MATCH` (described below) within the first-level fitting scheme.

---

```

1: function MATCH-1( $\text{AIVD}, \text{AIVD}_{\text{emp}}$ )
2:    $\text{AIVD}' = (\text{AIVD}, 0)$ 
3:   return MATCH( $\text{AIVD}', \text{AIVD}_{\text{emp}}$ )
4: end function

```

---

Function `MATCH-2` checks whether there is an overlap between the model SIVD uncertainty range obtained from  $\bar{\beta}$  (composite fitting information) and SIVD (com-

posite SIVD information) and the empirical one encoded by  $\text{SIVD}_{\text{emp}}$ . It acts as an interface for `MATCH` (described below) within the second-level fitting scheme.

---

```

1: function MATCH-2( $\bar{\beta}, \text{SIVD}, \text{SIVD}_{\text{emp}}$ )
2:    $(\text{SIVD}^{\text{avg}}, \text{SIVD}^{\text{stat}}, \text{SIVD}^{\text{syst}}) = \text{MEANSTATSYST}(\bar{\beta}, \text{SIVD})$ 
3:    $\text{SIVD}' = (\text{SIVD}^{\text{avg}}, \text{MAX}(\text{SIVD}^{\text{stat}}, \text{SIVD}^{\text{syst}}))$ 
4:   return MATCH( $\text{SIVD}', \text{SIVD}_{\text{emp}}$ )

```

---

## 5: end function

Function ORD-1 (first version) checks whether  $\text{AIVD}_L$

(real value) is smaller than  $\text{AIVD}_R$  (real value), acting as an interface for ORD within the first-level fitting scheme.

---

```

1: function ORD-1(AIVDL, AIVDR)
2:   return ORD(AIVDL, AIVDR)
3: end function

```

---

Function ORD-1 (second version) checks whether AIVD (real value) is smaller than the average stored in

$\text{AIVD}_{\text{emp}}$  (uncertainty range), acting as an interface for ORD within the first-level fitting scheme.

---

```

1: function ORD-1(AIVD, AIVDemp)
2:   (AIVDempavg, AIVDemperr) = AIVDemp
3:   return ORD(AIVD, AIVDempavg)
4: end function

```

---

Function ORD-2 (first version) checks whether the average stored in the SIVD uncertainty range obtained from  $\bar{\beta}_L$  (composite fitting information) and  $\text{SIVD}_L$  (composite SIVD information) is smaller than the average stored

in that obtained from  $\bar{\beta}_R$  (composite fitting information) and  $\text{SIVD}_R$  (composite SIVD information), acting as an interface for ORD within the second-level fitting scheme.

---

```

1: function ORD-2( $\bar{\beta}_L$ ,  $\bar{\beta}_R$ , SIVDL, SIVDR)
2:   (SIVDLavg, SIVDLstat, SIVDLsyst) = MEANSTATSYST( $\bar{\beta}_L$ , SIVDL)
3:   (SIVDRavg, SIVDRstat, SIVDRsyst) = MEANSTATSYST( $\bar{\beta}_R$ , SIVDR)
4:   return ORD(SIVDLavg, SIVDRavg)
5: end function

```

---

Function ORD-2 (second version) checks whether the average stored in the SIVD uncertainty range obtained from  $\bar{\beta}$  (composite fitting information) and SIVD (com-

posite SIVD information) is smaller than the average stored  $\text{SIVD}_{\text{emp}}$ , acting as an interface for ORD within the second-level fitting scheme.

---

```

1: function ORD-2( $\bar{\beta}$ , SIVD, SIVDemp)
2:   (SIVDavg, SIVDstat, SIVDsyst) = MEANSTATSYST( $\bar{\beta}$ , SIVD)
3:   (AIVDempavg, AIVDemperr) = AIVDemp
4:   return ORD(SIVDavg, AIVDempavg)
5: end function

```

---

Function MEANSTATSYST estimates a mean, a statistical error and a systematic error from a piece of composite fitting information and an associated piece of composite SIVD information, which are the two arguments of the

function. It returns the 3-tuple comprising of the three computed real numbers. Note the decompression of composite fitting information (line 2) and the decompression of composite SIVD information (line 3).

---

```

1: function MEANSTATSYST( $\bar{\beta}$ , SIVD)

```



```

2:  ( $\beta, \alpha_L, \alpha_R, \alpha_{\text{fit}}, \alpha_{\text{err}}$ ) =  $\bar{\beta}$ 
3:  ( $\text{SIVD}_L, \text{SIVD}_R$ ) =  $\text{SIVD}$ 
4:   $\text{SIVD}' = \text{INTERPOL}(\alpha_L, \alpha_R, \alpha_{\text{fit}}, \text{SIVD}_L, \text{SIVD}_R)$ 
5:   $\text{SIVD}_{\text{syst}} = \text{COMPSYSTEMERR}(\alpha_L, \alpha_R, \alpha_{\text{err}}, \text{SIVD}_L, \text{SIVD}_R)$ 
6:  ( $\text{SIVD}_{\text{avg}}, \text{SIVD}_{\text{stat}}$ ) =  $\text{SIVD}'$ 
7:  return ( $\text{SIVD}_{\text{avg}}, \text{SIVD}_{\text{stat}}, \text{SIVD}_{\text{syst}}$ )
8: end function

```

The following is a list of functions for which only text

explanations are provided in schematic way, sometimes accompanied by figures.

- 
- **INIT-1**( $\delta\alpha$ ):
    - gives the left and right boundaries of the largest possible interval for which the  $\alpha$  parameter is compatible with the stochastic model in use, given the grid spacing  $\delta\alpha$
    - input:  $\delta$  is a real number
    - in practice it returns  $(\delta\alpha, 1 - \delta\alpha)$  regardless of whether PG or MPG is used
  - **INIT-2**( $\delta\beta, k, \text{AIVD}_{\text{emp}}$ ):
    - gives the left and right boundaries of the largest possible interval, if any, for which the  $\beta$  parameter allows for the (first level) fitting of  $\text{AIVD}(\alpha)$  to successfully take place, given the grid spacing  $\delta\beta$
    - input:  $\delta\beta$  is a real number,  $k$  is a positive integer and  $\text{AIVD}_{\text{emp}}$  is an uncertainty range
    - assumes that there exists at most one  $\beta$  interval  $[\beta_L, \beta_R]$  for which there exists an  $\alpha$  such that  $\langle \text{AIVD} \rangle_{\alpha, \beta}^k = \text{AIVD}_{\text{emp}}$  is satisfied
    - starts from the largest interval allowed by the model and independently adjusts each of the two boundaries via a branching algorithm, until the desired interval is reached
    - returns two (incompatible) boundaries  $\beta_L > \beta_R$  if such an interval does not exist
  - **MIDDLE**( $l, r, \delta$ ):
    - computes the value closest to the average between  $l$  and  $r$ , on a grid of spacing  $\delta$
    - input:  $l, r, \delta$  are all real numbers
    - assumes that the interval length  $l - r$  is equal to an integer times  $\delta$
  - **DISTINCT**( $m, l, r$ ):
    - checks whether  $m$  is different than both  $l$  and  $r$
    - input:  $m, l, r$  are all real numbers constrained to a grid of constant spacing
  - **INTERNFITLIN**( $p_L, p_R, O_L, O_R, O_{\text{emp}}$ ):
    - adjusts a parameter  $p$  such that an observable  $O$  attains a value compatible with the empirical in  $O_{\text{emp}}$  interval, assuming that  $O$  is a linear function of  $p$  within the  $[p_L, p_R]$  interval
    - input:  $p_L, p_R$  are real numbers, encoding the left and right boundaries of the interval;  $O_L, O_R$  are mean-error pairs of real numbers encoding the theoretical uncertainty ranges of the observable for the left and for the right boundaries;  $O_{\text{emp}}$  is a mean-error pair of real numbers encoding the empirical uncertainty range
    - returns the value and associated error of the  $p$  parameter resulting from this fitting process ( $p_{\text{fit}}, p_{\text{err}}$ ), computed based on geometrical considerations, in the manner illustrated in Fig. 1(a)
    - $p_{\text{fit}}$  is calculated first by intersecting the theoretical line with the empirical one, disregarding all errors; then,  $p_{\text{err}}$  is calculated by assuming that the theoretical error is constant within the  $[p_L, p_R]$  interval, with value given by interpolating the errors contained by  $O_L$  and  $O_R$  at  $p_{\text{fit}}$
    - $p_{\text{err}}$  takes its origin both in the empirical error as well as in the theoretical error, but also depends on the slope resulting from the linear approximation

- **MATCH**( $r_1, r_2$ ):
  - checks whether there is an overlap between the uncertainty ranges encoded by  $r_1$  and  $r_2$
  - input:  $r_1, r_2$  are mean-error pairs of real numbers
- **ORD**( $v_L, v_R$ ):
  - checks whether the condition  $v_L < v_R$  is satisfied
  - input:  $v_L, v_R$  are real numbers
  - assumes that  $v_L \neq v_R$
- **GENSEQSIVD**( $\alpha, \beta, k, n$ )
  - numerically generates a sequence of  $n$  SIVD values according to the respective stochastic model, subject to parameter values indicated by  $k, \alpha, \beta$
  - input:  $\alpha, \beta$  are real numbers, while  $k, n$  are positive integers
- **MERGE**( $\text{SIVD}_1^{\text{seq}}, \text{SIVD}_2^{\text{seq}}$ )
  - merges two sequences of (real) SIVD values
  - input:  $\text{SIVD}_1^{\text{seq}}, \text{SIVD}_2^{\text{seq}}$  are both sequences of (real) SIVD values
- **COMPAVGERR**( $\text{SIVD}^{\text{seq}}$ )
  - computes the mean and standard error of the mean from  $\text{SIVD}^{\text{seq}}$
  - input:  $\text{SIVD}^{\text{seq}}$  is a sequence of real SIVD values
- **INTERPOL**( $\alpha_L, \alpha_R, \alpha_{\text{fit}}, \text{SIVD}_L, \text{SIVD}_R$ )
  - estimates the mean and error in SIVD corresponding to  $\alpha_{\text{fit}}$  based on the values attained for  $\alpha_L$
  - input:  $\alpha_L, \alpha_R, \alpha_{\text{fit}}$  are real numbers, while  $\text{SIVD}_L, \text{SIVD}_R$  are mean-error pairs of real numbers
  - uses on a linear interpolation within the  $[\alpha_L, \alpha_R]$  interval, separately for the mean and for the error
- **COMPSYSTERR**( $\alpha_L, \alpha_R, \alpha_{\text{err}}, \text{SIVD}_L, \text{SIVD}_R$ )
  - estimates the systematic error  $\text{SIVD}^{\text{syst}}$  of the SIVD quantity induced by the error  $\alpha_{\text{err}}$  (associated to fitting the  $\alpha$  parameter in terms of the AIVD quantity), assuming that SIVD is a linear function of  $\alpha$  within the  $[\alpha_L, \alpha_R]$  interval
  - input:  $\alpha_L, \alpha_R, \alpha_{\text{err}}$  are real numbers while  $\text{SIVD}_L, \text{SIVD}_R$  are mean-error pairs of real numbers encoding the theoretical uncertainty ranges on the left and right boundaries
  - $\text{SIVD}^{\text{syst}}$  is computed based on geometrical considerations, in the manner illustrated in Fig. 1(b)

#### D. Algorithm usage

This section explain how the formalism presented throughout this document is effectively used for producing the results shown in the “Model fitting” and “Model

outcomes” sections of the main text.

First, the formalism is used for producing the plots showing the  $\text{SIVD}(\beta)$  dependence (“Model fitting” section). For either PG or MPG, for a specific  $k$  value and a specific  $\beta$  on-grid value, the drawn model SIVD uncertainty range is obtained after the following computational steps:

- 1:  $(\alpha_L, \alpha_R, \alpha_{\text{fit}}, \alpha_{\text{err}}) = \text{FIT-1}(\beta, k)$
- 2:  $\bar{\beta} = (\beta, \alpha_L, \alpha_R, \alpha_{\text{fit}}, \alpha_{\text{err}})$
- 3:  $\text{SIVD} = \text{NUMSIVD}(\bar{\beta}, k)$
- 4:  $(\text{SIVD}_{\text{avg}}, \text{SIVD}_{\text{stat}}, \text{SIVD}_{\text{syst}}) = \text{MEANSTATSYST}(\bar{\beta}, \text{SIVD})$

- ▷ executing 1st-level fitting
- ▷ creating composite fitting information
- ▷ numeric SIVD calculations

which provides the values of the SIVD average  $\text{SIVD}_{\text{avg}}$ ,

the SIVD statistical error  $\text{SIVD}_{\text{stat}}$  and the SIVD system-

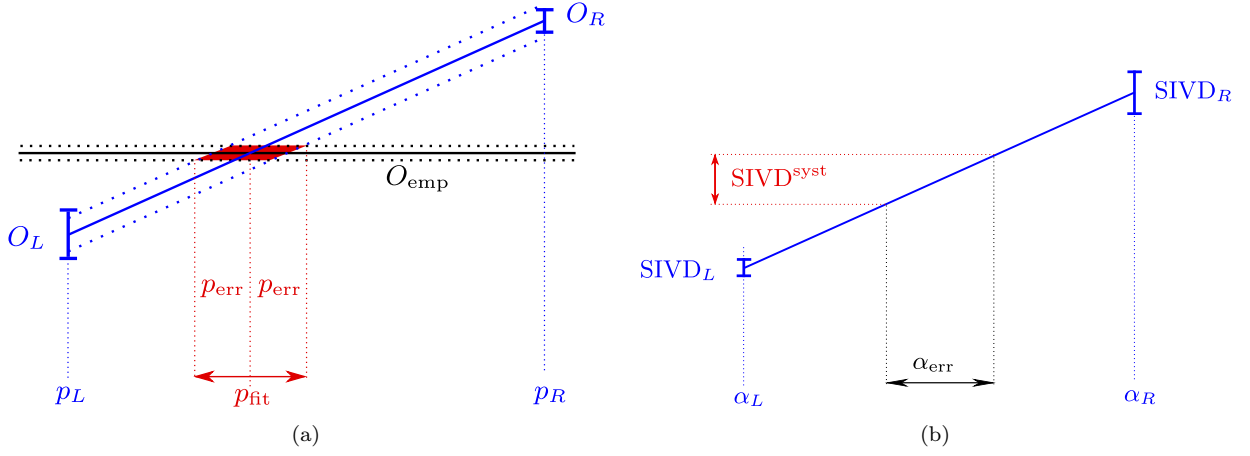

FIG. 1. Illustration of computation carried out by INTERFITLIN (a) and by COMPSYSTEMERR (b), with the output quantities highlighted in red.

atic error  $\text{SIVD}_{\text{syst}}$ . One can then place a point at coordinates  $(\beta, \text{SIVD}_{\text{avg}})$ , within the respective  $k$  curve, with an error bar given by the maximum between  $\text{SIVD}_{\text{stat}}$  and  $\text{SIVD}_{\text{syst}}$ .

Second, the formalism is used for providing the best-

fitting, on-grid values for the  $\alpha$  and  $\beta$  model parameters, which are used for generating sets of cultural vectors on which the LTCD-STCB analysis is applied (“Model outcomes” section). For either PG or MPG and for a specific  $k$  value, the following procedure is followed:

---

```

1:  $(\bar{\beta}_L, \bar{\beta}_R, \beta_{\text{fit}}, \beta_{\text{err}}) = \text{FIT-2}(k)$ 
2:  $(\beta_L, \alpha_L^L, \alpha_L^R, \alpha_L^{\text{fit}}, \alpha_L^{\text{err}}) = \bar{\beta}_L$ 
3:  $(\beta_R, \alpha_R^L, \alpha_R^R, \alpha_R^{\text{fit}}, \alpha_R^{\text{err}}) = \bar{\beta}_R$ 
4: if  $\beta_{\text{fit}} - \beta_L < \beta_R - \beta_{\text{fit}}$  then
5:    $\beta = \beta_L$ 
6:   if  $\alpha_L^{\text{fit}} - \alpha_L^L < \alpha_L^R - \alpha_L^{\text{fit}}$  then
7:      $\alpha = \alpha_L^L$ 
8:   else
9:      $\alpha = \alpha_L^R$ 
10:  end if
11: else
12:    $\beta = \beta_R$ 
13:   if  $\alpha_R^{\text{fit}} - \alpha_R^L < \alpha_R^R - \alpha_R^{\text{fit}}$  then
14:      $\alpha = \alpha_R^L$ 
15:   else
16:      $\alpha = \alpha_R^R$ 
17:   end if
18: end if

```

---

```

  > Executing 2nd-level fitting
  > Decompressing left- $\beta$  composite fitting information
  > Decompressing right- $\beta$  composite fitting information
  > choosing  $\beta_L$ , since it is closer to  $\beta$ 
  > choosing  $\alpha_L^L$ , since it is closer to  $\alpha_L^{\text{fit}}$ 
  > choosing  $\alpha_L^R$ , since it is closer to  $\alpha_L^{\text{fit}}$ 
  > choosing  $\beta_R$ , since it is closer to  $\beta$ 
  > choosing  $\alpha_R^L$ , since it is closer to  $\alpha_R^{\text{fit}}$ 
  > choosing  $\alpha_R^R$ , since it is closer to  $\alpha_R^{\text{fit}}$ 

```

---

which provides the best on-grid values for the  $(\alpha, \beta)$  pair.
